# Supplementary material
Source: publisher figshare collection journal article supplement (https://gsajournals.figshare.com/ndownloader/files/27742047)

Figure S1. Pipeline for analysis of *Metarhizium humberi* ESALQ1638 secretome


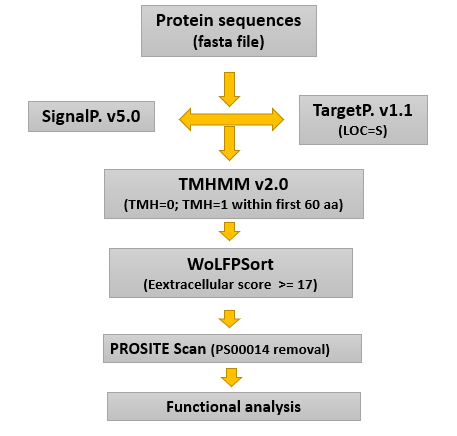

Supplement: Supplementary file 1 [file 27742047]
